# Supplementary material
Source: publisher site journal article supplement (https://www.dovepress.com/article/566088)
Supplement: Supplementary file 1 [file Supplemental%20Table%201.docx]

**Supplemental Table 1** Cycle-specific transition probabilities in inavolisib group and placebo group

| Stage | % - PFS | % - PD | % - Death |
| --- | --- | --- | --- |
| **inavolisib group** | | | |
| 1 | 1.00 | 0.00 | 0.00 |
| 2 | 0.96723 | 0.03227 | 0.00050 |
| 3 | 0.93128 | 0.06701 | 0.00170 |
| 4 | 0.89492 | 0.10127 | 0.00380 |
| 5 | 0.85884 | 0.13436 | 0.00678 |
| 6 | 0.82339 | 0.16594 | 0.01066 |
| 7 | 0.78875 | 0.19583 | 0.01540 |
| 8 | 0.75504 | 0.22396 | 0.02098 |
| 9 | 0.72234 | 0.25029 | 0.02736 |
| 10 | 0.69068 | 0.27480 | 0.03450 |
| 11 | 0.66009 | 0.29753 | 0.04236 |
| 12 | 0.63058 | 0.31851 | 0.05089 |
| **placebo group** | | | |
| 1 | 1 | 0 | 0 |
| 2 | 0.88136 | 0.11815 | 0.00048 |
| 3 | 0.79612 | 0.19410 | 0.00977 |
| 4 | 0.72459 | 0.25213 | 0.02327 |
| 5 | 0.66253 | 0.29796 | 0.03949 |
| 6 | 0.60778 | 0.33463 | 0.05757 |
| 7 | 0.55896 | 0.36407 | 0.07696 |
| 8 | 0.51511 | 0.38764 | 0.09723 |
| 9 | 0.47552 | 0.40636 | 0.11811 |
| 10 | 0.43961 | 0.42104 | 0.13934 |
| 11 | 0.40693 | 0.43230 | 0.16075 |
| 12 | 0.37710 | 0.44067 | 0.18221 |
